# Supplementary material for: Early-Onset Alzheimer’s Disease Mimicking Cognitive Progression Independent of Relapse Activity in Multiple Sclerosis: A Case Report and Diagnostic Strategy
Source: Research Square preprint supplement (doi:10.21203/rs.3.rs-8570961/v1), 2026-01-20
Supplement: Supplementary file 1 [file 25dcdb9ec12a3a7eafd560f4.xlsx]

## Sheet: Sheet2
	Feature	Cognitive PIRA	Early-onset AD (PIRA mimic)	Present case
	Primary cognitive domain	Predominantly information processing speed, with involvement of visual/spatial and verbal memory (Fuchs et al. 2024)	Memory-dominant (68%) and non-amnestic variants (posterior cortical, logopenic aphasia, dysexecutive) (Koedam et al. 2010)	Memory dominant
	Progression rate	Typically gradual, chronic (Fuchs et al. 2024)	Often more rapid than Late-onset AD progression (van der Vlies et al. 2009)	Rapid decline over 2 years
	Relation to physical disability	Outside of both clinically captured relapse and physical-disability progression (Fuchs et al. 2024)	Disproportionate to physical disability (Ambulatory but demented) (van der Flier et al. 2011)	Disproportionate to physical disability (EDSS 4.0 with severe dementia)
	Response to DMT	Not established; cognitive PIRA may persist despite high-efficacy therapy (Fuchs et al. 2024)	No response / Continues to progress	Progression despite ofatumumab treatment
	Imaging pattern (MRI/SPECT)	No consistent lesion activity; cognitive decline often occurs independently of MRI lesion activity (Ziccardi et al. 2025)	Hippocampal atrophy, Parietal/Precuneus atrophy and hypoperfusion (Mendez et al. 2019)	Parietal atrophy and hypoperfusion
	CSF biomarkers	Not established	Aβ42 low, p-Tau high, Aβ42/40 ratio low (Mendez et al. 2019)	AD pattern (Low Aβ ratio, High p-Tau)
